# Supplementary material for: Photodynamic Therapy Efficacy of Novel Zinc Phthalocyanine Tetra Sodium 2-Mercaptoacetate Combined with Cannabidiol on Metastatic Melanoma
Source: MDPI journal article supplement (doi:10.3390/pharmaceutics14112418), 2022-11-09
Supplement: s1 [file s1]

# Zinc phthalocyanine tetra sodium 2-mercaptoacetate enhanced with cannabidiol in photodynamic therapy of skin cancer.

Nkune Williams Nkune<sup>1</sup>, Gauta Gold Matlou<sup>1</sup> and Heidi Abrahamse<sup>1\*</sup>

<sup>1</sup>Laser Research Centre, Faculty of health sciences, University of Johannesburg, P.O Box 17011, Johannesburg 2028, South Africa.

\*Correspondence: habrahamse@uj.ac.za.

## Supplementary information.

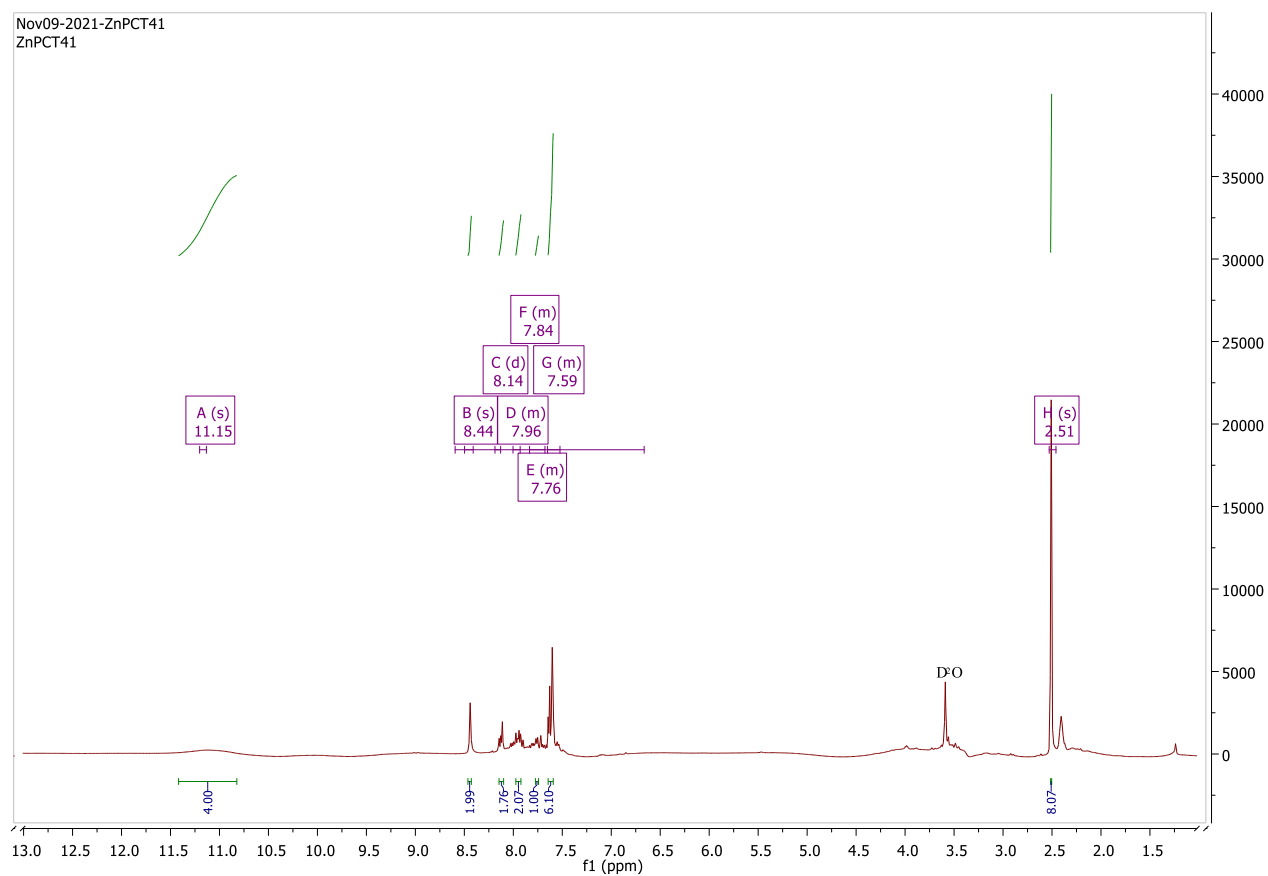

Figure S1. NMR spectra of ZnPcTS41 in D<sub>2</sub>O

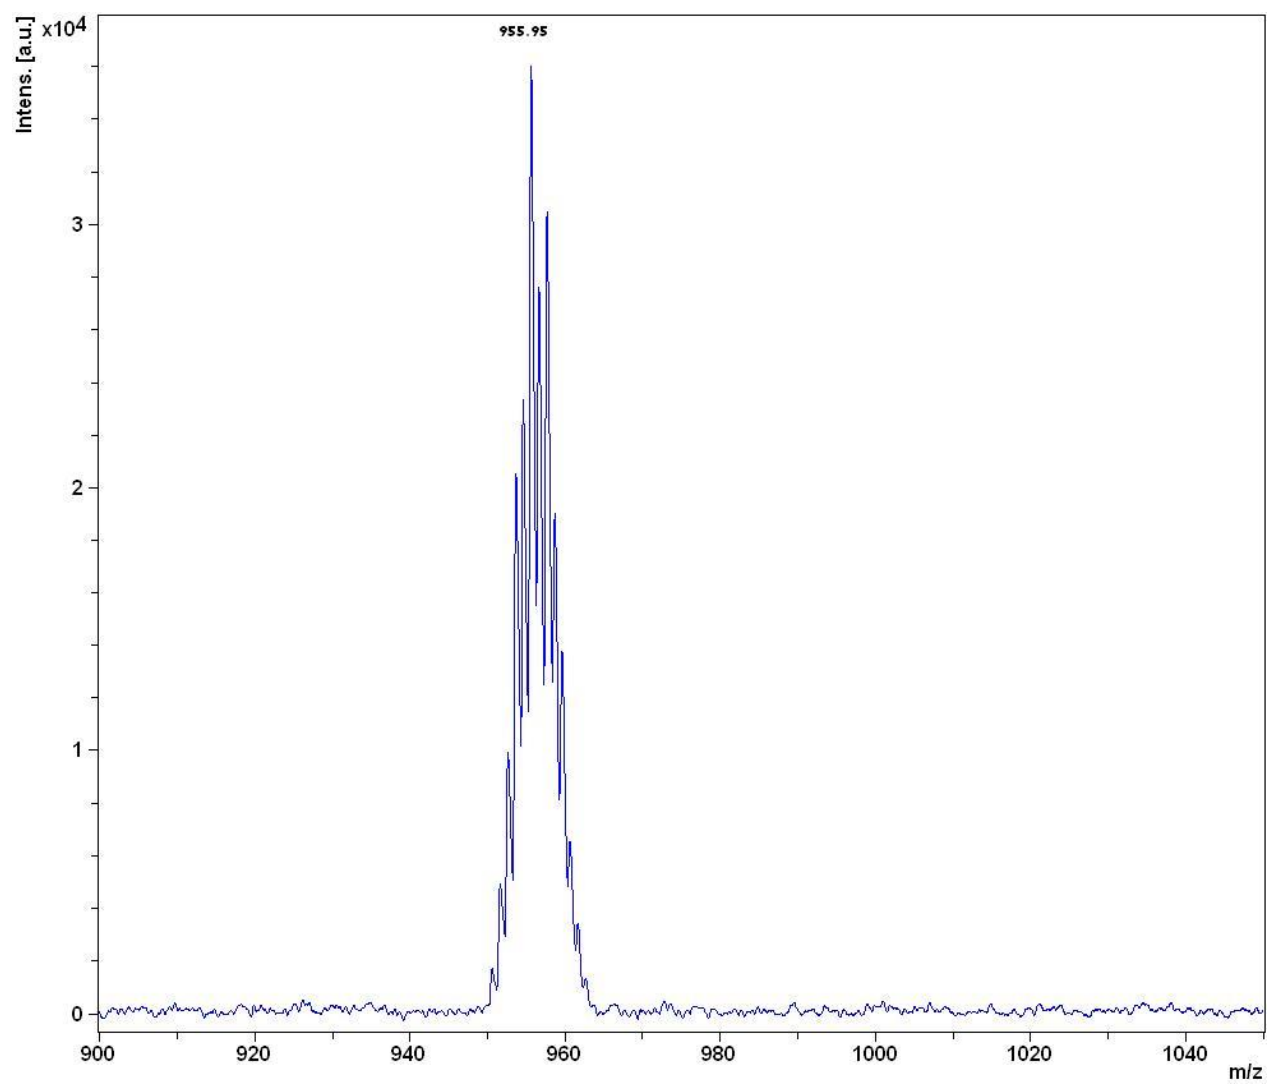

Figure S2. MALDI-TOF mass spectrum of the ZnPcTS41 using  $\alpha$ -cyano-hydroxycinnamic acid matrix.

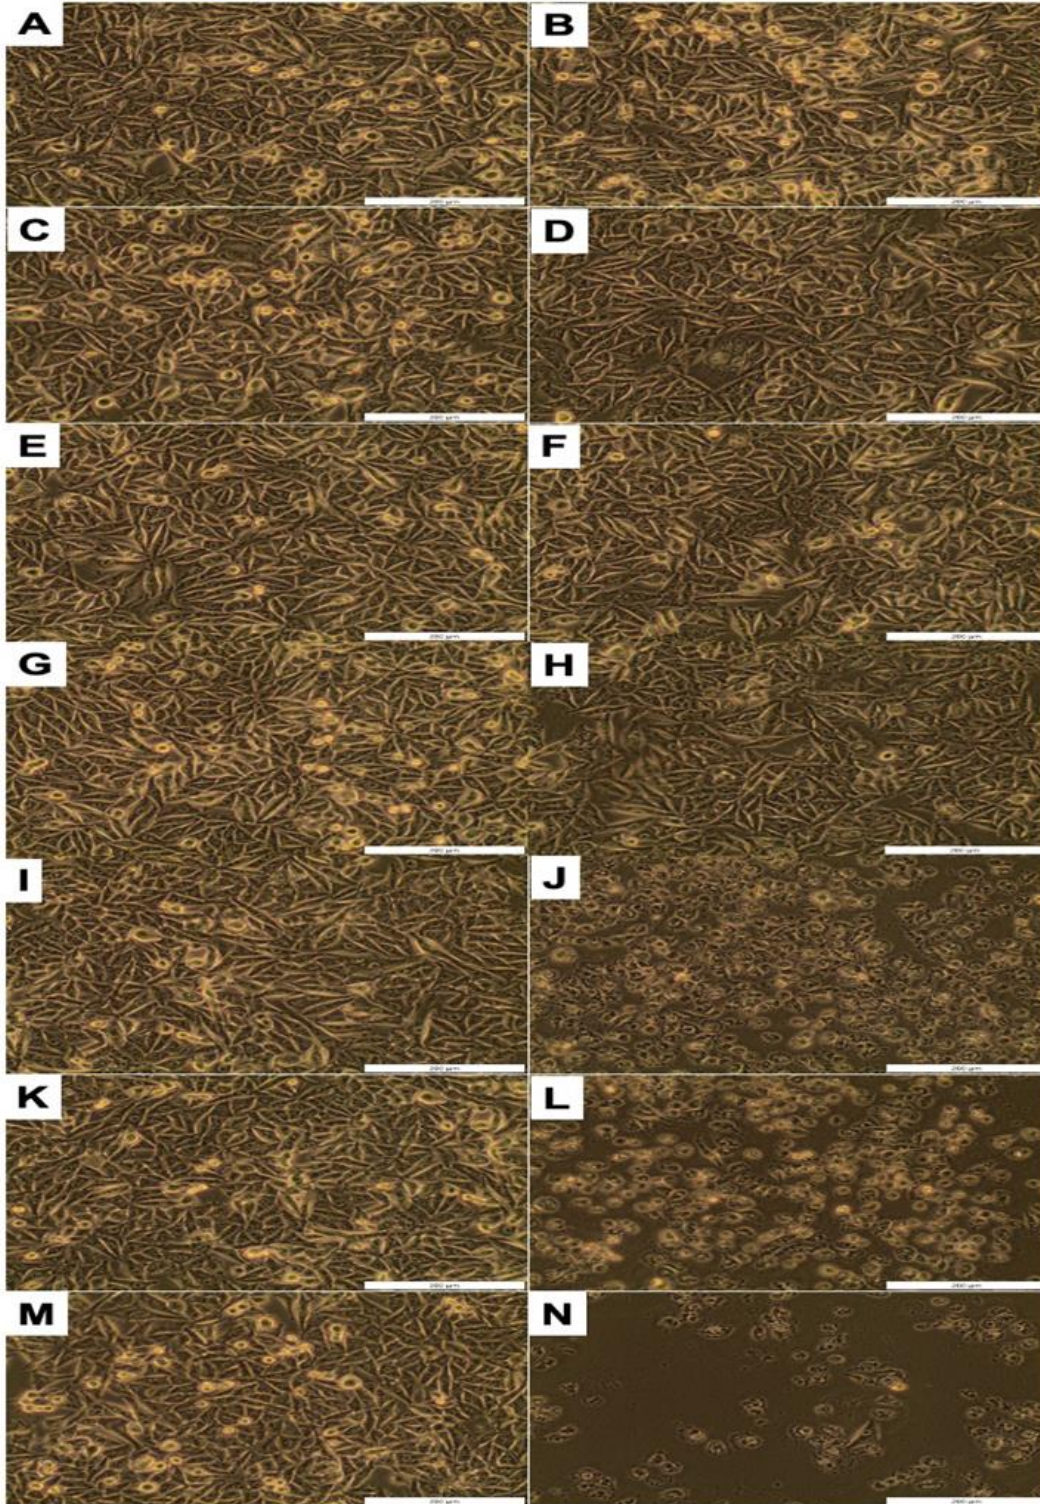

Figure S3: Cellular morphology of A375 post-treatment with ZnPcTS41 (X100 magnification). Untreated control cells (A); Cells only (B); Cells + Irradiation (C); 1  $\mu$ m (D); 1  $\mu$ m + Irradiation (E); 2  $\mu$ m CBD (F); 2  $\mu$ m + Irradiation (G); 2  $\mu$ m (H); 2  $\mu$ m + Irradiation (I); 4  $\mu$ m (J); 4  $\mu$ m + Irradiation (K); 6  $\mu$ m (L); 6  $\mu$ m + Irradiation (M); 8  $\mu$ m (N); 8  $\mu$ m + Irradiation.

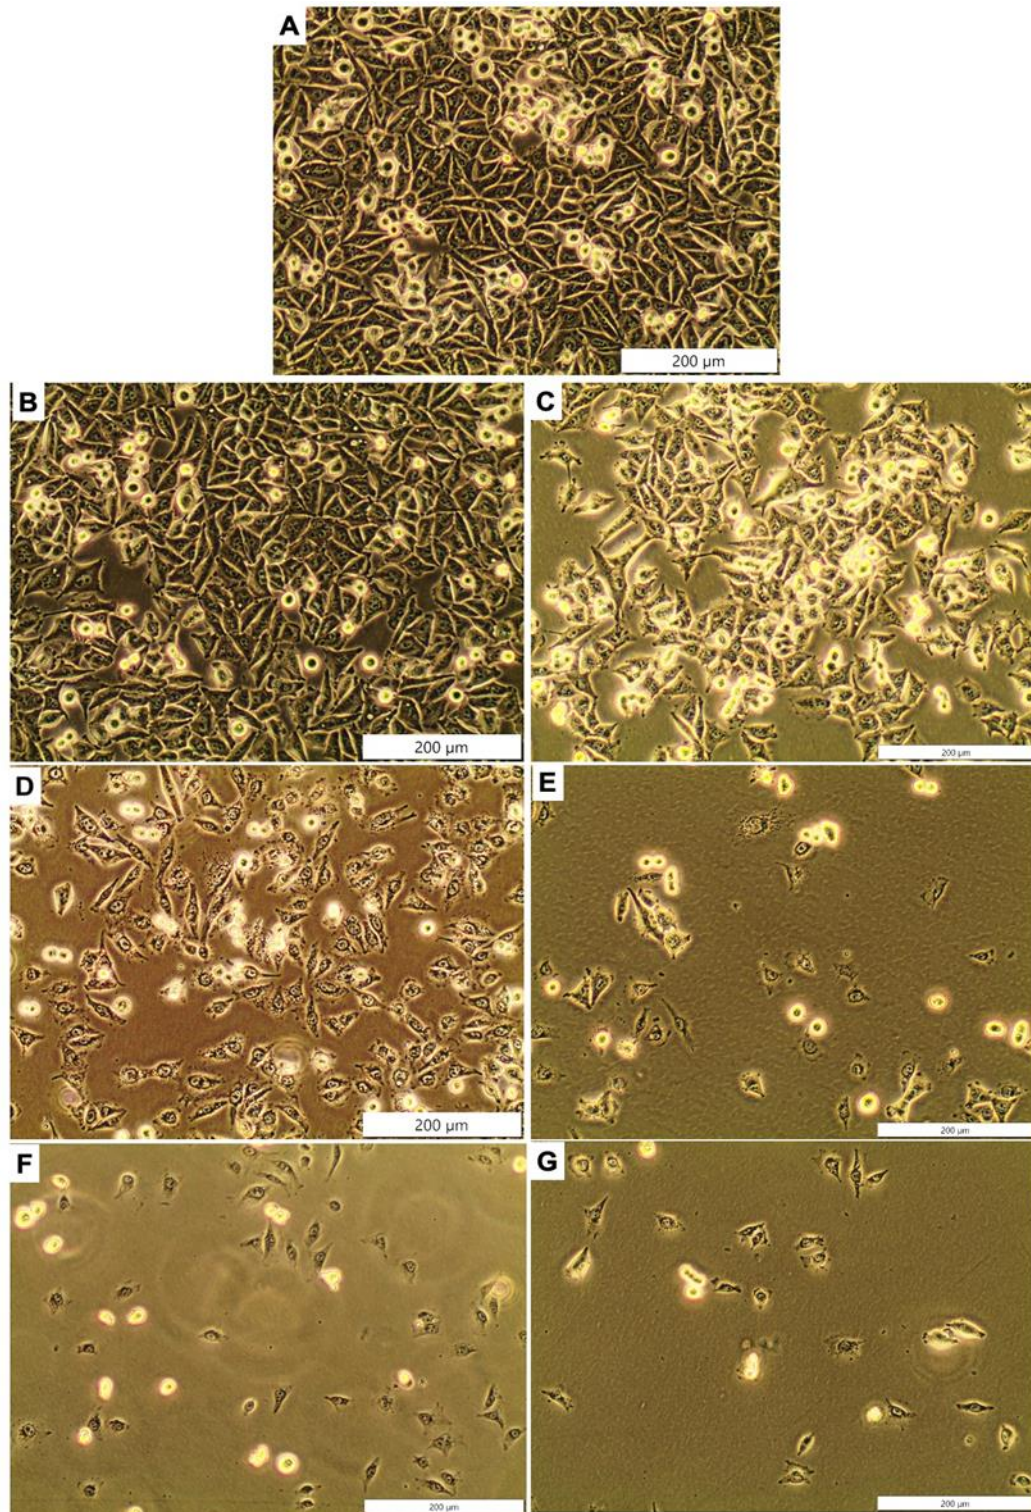

Figure S4: Morphological analysis of A375 24 h post CBD treatment (X100 magnification). untreated cells (A); Cells + ethanol (B); 0.3  $\mu\text{m}$  (C); 0.5  $\mu\text{m}$  CBD (D); 0.7  $\mu\text{m}$  CBD (E); 0.9  $\mu\text{m}$  CBD (F); 1.1  $\mu\text{m}$  CBD (X100 magnification).
